# Supplementary material for: Square planar Ni(ii) complexes of acetoneN4-phenyl-thiosemicarbazone andin situgenerated benzoyl thiosemicarbazide ligands: synthesis, spectral and structural characterizations, thermal behaviour and electrochemical studies
Source: Royal Society of Chemistry journal article supplement (doi:10.1039/c7nj01030c), 2017-01-01
Supplement: c7nj01030c1.pdf [file c7nj01030c1.pdf]

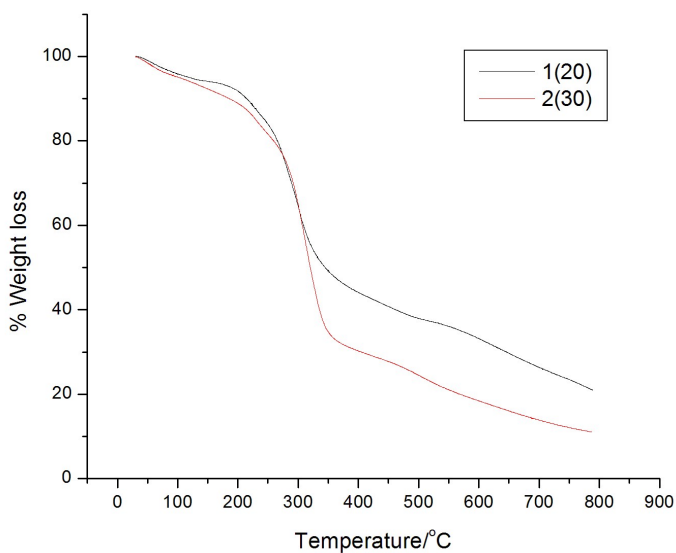

**Supplementary Fig S1.** TGA curves showing the degradation of complex **1** at 20 and 30 °C min<sup>-1</sup> in nitrogen atmosphere

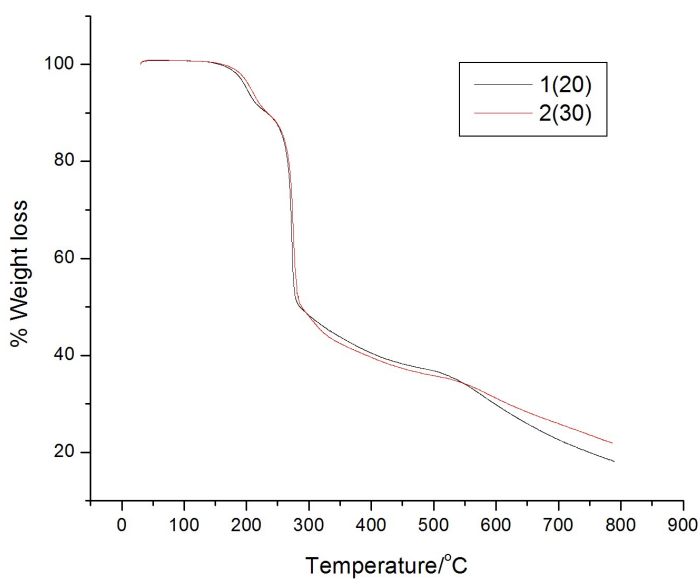

**Supplementary Fig S2.** TGA curves showing the degradation of complex **2** at 20 and 30 °C min<sup>-1</sup> in nitrogen atmosphere

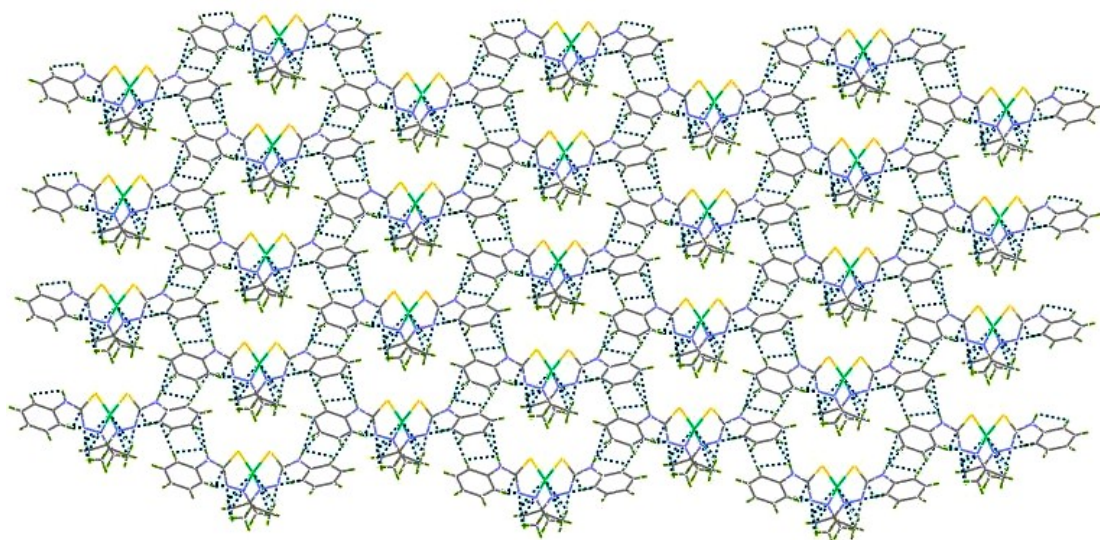

**Supplementary Fig S3.** Intramolecular C-H $\cdots$ N and N-H $\cdots$ C Hydrogen bonding in [Ni(Hapt)<sub>2</sub>] (**1**) leading to closed ladder type structure

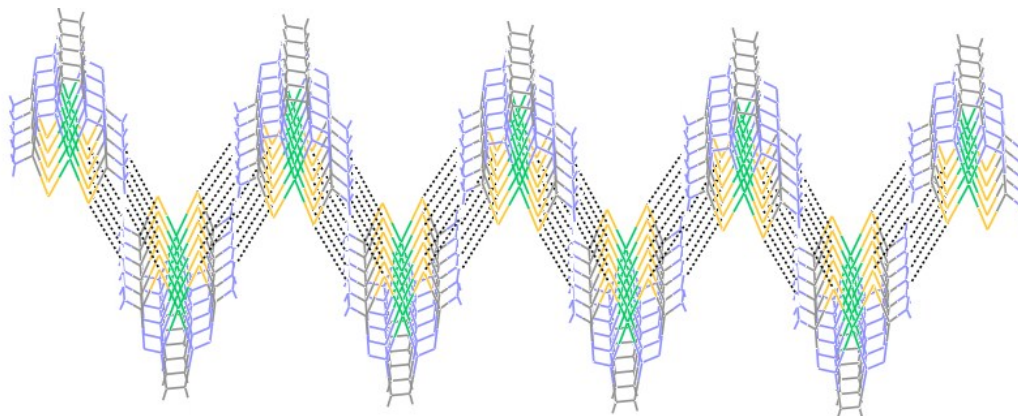

**Supplementary Fig S4.** Intermolecular N-H $\cdots$ S Hydrogen bonding in [Ni(btsc)](**2**) leading to the formation of a superimposed stacked structure
